# Supplementary material for: The value of biodiversity for the functioning of tropical forests: insurance effects during the first decade of the Sabah biodiversity experiment
Source: PubMed Central journal article supplement (PMC5204142; doi:10.1098/rspb.2016.1451), 2016-12-14
Supplement: rspb20161451supp2.pdf [file rspb20161451supp2.pdf]

**Supplementary material Table 1 – Species descriptions.**

Descriptions of the sixteen dipterocarp species planted in the Sabah Biodiversity Experiment: species names and authorities, taxonomic group (Ashton 1982; Kamiya et al. 2005), timber colour group (Symington 1943; Ashton 1982), ecology (Ashton 1982), and their IUCN Red List status (downloaded on 2<sup>nd</sup> December 2014 from [www.iucnredlist.org](http://www.iucnredlist.org)).

| Species name                                | Species code | Taxonomic group                                   | Timber group   | Ecology                                                                         | IUCN Red List         |
|---------------------------------------------|--------------|---------------------------------------------------|----------------|---------------------------------------------------------------------------------|-----------------------|
| <i>Dipterocarpus conformis</i> Slooten      | DC           | Sister to Shoreae                                 | –              | Rare, hill dipterocarp forest, clay-rich soils, < 800 m                         | –                     |
| <i>Dryobalanops lanceolata</i> Burck        | DL           | Shoreae                                           | –              | Widespread on fertile soils, abundant on undulating land, to 700 m              | Endangered            |
| <i>Hopea ferruginea</i> Parij               | HF           | Shoreae                                           | –              |                                                                                 | Critically endangered |
| <i>Hopea sangal</i> Korth.                  | HS           | Shoreae                                           | –              | Often on or near river banks in low country and to 500 m                        | Critically endangered |
| <i>Parashorea malaanonan</i> (Blanco) Merr. | PM           | Shoreae                                           | –              | Local on clay-rich soil, rarely on riverbanks, on ridges in mountains to 1350 m | Critically endangered |
| <i>Parashorea tomentella</i> (Blanco) Merr. | PT           | Shoreae                                           | –              | Common on flat to rolling hills < 200 m                                         | –                     |
| <i>Shorea argentifolia</i> Sym.             | SA           | Shoreae > Shorea > Mutica sect. > Mutica subsect. | Red Meranti    | Locally frequent on ridges, hillsides, and valleys, < 600 m                     | Endangered            |
| <i>Shorea beccariana</i> Bruck              | SB           | Shoreae > Shorea > Pachycarpae sect.              | Red Meranti    | Common, lowlands, and dry ridges to 1350 m                                      | –                     |
| <i>Shorea faguetiana</i> Heim.              | SF           | Shoreae > Shorea > Richetioides sect. >           | Yellow Meranti | Low hills and particularly ridge tops at 150–700 m, occasionally to 1000 m      | Endangered            |

|                                     |     |                                                                  |                |                                                                                                        |                       |
|-------------------------------------|-----|------------------------------------------------------------------|----------------|--------------------------------------------------------------------------------------------------------|-----------------------|
|                                     |     | Richetioides subsect.                                            |                |                                                                                                        |                       |
| <i>Shorea gibbosa</i><br>Brandis.   | SG  | Shoreae > Shorea ><br>Richetioides sect.                         | Yellow Meranti | Locally common on fertile clay-loam soils on undulating land and river banks to 650 m                  | Critically endangered |
| <i>Shorea johorensis</i><br>Foxw.   | SJ  | Shoreae > Shorea ><br>Brachypterae sect.                         | Red Meranti    | Very common on well-drained fertile soils < 600 m                                                      | Critically endangered |
| <i>Shorea leprosula</i><br>Miq.     | SL  | Shoreae > Shorea ><br>Mutica sect. ><br><br>Mutica subsect.      | Red Meranti    | Widespread, fast-growing emergent, common < 700 m                                                      | Endangered            |
| <i>Shorea macrophylla</i><br>Ashton | SM1 | Shoreae > Shorea ><br>Pachycarpae sect.                          | Red Meranti    | Locally abundant on periodically flooded alluvium, rarer on hillsides, < 600 m                         | Vulnerable            |
| <i>Shorea macroptera</i> King       | SM2 | Shoreae > Shorea ><br>Mutica sect. ><br><br>Auriculatae subsect. | Red Meranti    | Common, sandy clay soils on low hills to 600 m                                                         | –                     |
| <i>Shorea ovalis</i><br>Korth.      | SO  | Shoreae > Shorea ><br><br>Ovalis sect.                           | Red Meranti    | Scattered, usually in moist places in valleys and low-lying ground, occasionally ultrabasics, to 500 m | –                     |
| <i>Shorea parvifolia</i><br>Dyer    | SP  | Shoreae > Shorea ><br>Mutica sect. ><br>Mutica subsect.          | Red Meranti    | Perhaps the commonest dipterocarp, on clay soils on hills < 800 m                                      | –                     |

---
