# Supplementary material for: The value of biodiversity for the functioning of tropical forests: insurance effects during the first decade of the Sabah biodiversity experiment
Source: PubMed Central journal article supplement (PMC5204142; doi:10.1098/rspb.2016.1451), 2016-12-14
Supplement: rspb20161451supp3.pdf [file rspb20161451supp3.pdf]

Supplementary material Table 2 – 4-species mixture compositions

| GENERIC DIVERSITY LOW (2 SPECIES) | THIN CANOPY                         |                                     | THICK CANOPY                        |                                    |
|-----------------------------------|-------------------------------------|-------------------------------------|-------------------------------------|------------------------------------|
|                                   | <b>4.1</b>                          | <b>Tall + medium I</b>              | <b>4.5</b>                          | <b>Short + medium + tall I</b>     |
|                                   |                                     | <i>Parashorea malaanonan</i> (tall) |                                     | <i>Hopea sangal</i> (short)        |
|                                   |                                     | <i>Parashorea tomentella</i> (tall) |                                     | <i>Hopea ferruginea</i> (short)    |
|                                   |                                     | <i>Shorea beccariana</i> (medium)   |                                     | <i>Shorea beccariana</i> (medium)  |
|                                   |                                     | <i>Shorea leprosula</i> (medium)    |                                     | <i>Shorea johorensis</i> (tall)    |
|                                   | <b>4.2</b>                          | <b>Tall + medium II</b>             | <b>4.6</b>                          | <b>Short + medium + tall II</b>    |
|                                   |                                     | <i>Parashorea malaanonan</i> (tall) |                                     | <i>Hopea sangal</i> (short)        |
|                                   |                                     | <i>Parashorea tomentella</i> (tall) |                                     | <i>Hopea ferruginea</i> (short)    |
|                                   |                                     | <i>Shorea macroptera</i> (medium)   |                                     | <i>Shorea macroptera</i> (medium)  |
|                                   |                                     | <i>Shorea ovalis</i> (medium)       |                                     | <i>Shorea gibbosa</i> (tall)       |
|                                   | <b>4.3</b>                          | <b>Short + medium I</b>             | <b>4.7</b>                          | <b>Short + medium + tall III</b>   |
|                                   |                                     | <i>Hopea sangal</i> (short)         |                                     | <i>Hopea sangal</i> (short)        |
|                                   |                                     | <i>Hopea ferruginea</i> (short)     |                                     | <i>Hopea ferruginea</i> (short)    |
|                                   |                                     | <i>Shorea macrophylla</i> (medium)  |                                     | <i>Shorea macrophylla</i> (medium) |
|                                   |                                     | <i>Shorea parvifolia</i> (medium)   |                                     | <i>Shorea faguetiana</i> (tall)    |
| <b>4.4</b>                        | <b>Short + medium II</b>            | <b>4.8</b>                          | <b>Short + medium + tall IV</b>     |                                    |
|                                   | <i>Hopea sangal</i> (short)         |                                     | <i>Hopea sangal</i> (short)         |                                    |
|                                   | <i>Hopea ferruginea</i> (short)     |                                     | <i>Hopea ferruginea</i> (short)     |                                    |
|                                   | <i>Shorea argentifolia</i> (medium) |                                     | <i>Shorea argentifolia</i> (medium) |                                    |
|                                   | <i>Shorea parvifolia</i> (medium)   |                                     | <i>Shorea johorensis</i> (tall)     |                                    |

| GENERIC DIVERSITY HIGH (4 SPECIES) | THIN CANOPY                           |                                       | THICK CANOPY                          |                                       |
|------------------------------------|---------------------------------------|---------------------------------------|---------------------------------------|---------------------------------------|
|                                    | <b>4.9</b>                            | <b>Tall I</b>                         | <b>4.13</b>                           | <b>Tall + medium + Short I</b>        |
|                                    |                                       | <i>Dipterocarpus conformis</i> (tall) |                                       | <i>Dipterocarpus conformis</i> (tall) |
|                                    |                                       | <i>Dryobalanops lanceolata</i> (tall) |                                       | <i>Dryobalanops lanceolata</i> (tall) |
|                                    |                                       | <i>Parashorea malaanonan</i> (tall)   |                                       | <i>Shorea macrophylla</i> (medium)    |
|                                    |                                       | <i>Shorea faguetiana</i> (tall)       |                                       | <i>Hopea sangal</i> (short)           |
|                                    | <b>4.10</b>                           | <b>Tall II</b>                        | <b>4.14</b>                           | <b>Tall + medium + Short II</b>       |
|                                    |                                       | <i>Dipterocarpus conformis</i> (tall) |                                       | <i>Dipterocarpus conformis</i> (tall) |
|                                    |                                       | <i>Dryobalanops lanceolata</i> (tall) |                                       | <i>Dryobalanops lanceolata</i> (tall) |
|                                    |                                       | <i>Parashorea tomentella</i> (tall)   |                                       | <i>Shorea ovalis</i> (medium)         |
|                                    |                                       | <i>Shorea johorensis</i> (tall)       |                                       | <i>Hopea ferruginea</i> (short)       |
|                                    | <b>4.11</b>                           | <b>Tall II</b>                        | <b>4.15</b>                           | <b>Tall + medium + Short III</b>      |
|                                    |                                       | <i>Dipterocarpus conformis</i> (tall) |                                       | <i>Dipterocarpus conformis</i> (tall) |
|                                    |                                       | <i>Dryobalanops lanceolata</i> (tall) |                                       | <i>Dryobalanops lanceolata</i> (tall) |
|                                    |                                       | <i>Parashorea tomentella</i> (tall)   |                                       | <i>Shorea ovalis</i> (medium)         |
|                                    |                                       | <i>Shorea gibbosa</i> (tall)          |                                       | <i>Hopea sangal</i> (short)           |
| <b>4.12</b>                        | <b>Tall + medium III</b>              | <b>4.16</b>                           | <b>Tall + medium + Short IV</b>       |                                       |
|                                    | <i>Dipterocarpus conformis</i> (tall) |                                       | <i>Dipterocarpus conformis</i> (tall) |                                       |
|                                    | <i>Dryobalanops lanceolata</i> (tall) |                                       | <i>Dryobalanops lanceolata</i> (tall) |                                       |
|                                    | <i>Parashorea malaanonan</i> (tall)   |                                       | <i>Shorea macrophylla</i> (medium)    |                                       |
|                                    | <i>Shorea johorensis</i> (tall)       |                                       | <i>Hopea ferruginea</i> (short)       |                                       |
