# Supplementary material for: The value of biodiversity for the functioning of tropical forests: insurance effects during the first decade of the Sabah biodiversity experiment
Source: PubMed Central journal article supplement (PMC5204142; doi:10.1098/rspb.2016.1451), 2016-12-14
Supplement: rspb20161451supp4.pdf [file rspb20161451supp4.pdf]

**Supplementary material Table 3 – Plot-by-plot composition treatments**

| <b>Block</b> | <b>Plot</b> | <b>Species richness</b> | <b>Species composition</b>     |
|--------------|-------------|-------------------------|--------------------------------|
| South        | 1           | 4                       | 4.13                           |
| South        | 2           | 1                       | <i>Shorea beccariana</i>       |
| South        | 3           | 16                      | Climber cutting                |
| South        | 4           | 1                       | <i>Hopea sangal</i>            |
| South        | 5           | 16                      | 16                             |
| South        | 6           | 4                       | 4.6                            |
| South        | 7           | 1                       | <i>Shorea leprosula</i>        |
| South        | 8           | 16                      | 16                             |
| South        | 9           | 4                       | 4.3                            |
| South        | 10          | 1                       | <i>Dryobalanops lanceolata</i> |
| South        | 11          | 16                      | 16                             |
| South        | 12          | 4                       | 4.10                           |
| South        | 13          | 1                       | <i>Shorea gibbosa</i>          |
| South        | 14          | 16                      | 16                             |
| South        | 15          | 16                      | Climber cutting                |
| South        | 16          | 4                       | 4.11                           |
| South        | 17          | 16                      | 16                             |
| South        | 18          | 1                       | <i>Parashorea tomentella</i>   |
| South        | 19          | 4                       | 4.5                            |
| South        | 20          | NA                      | Control (unplanted)            |
| South        | 21          | 16                      | 16                             |
| South        | 22          | 16                      | Climber cutting                |
| South        | 23          | 1                       | <i>Shorea parvifolia</i>       |
| South        | 24          | NA                      | Control (unplanted)            |
| South        | 25          | 4                       | 4.2                            |
| South        | 26          | NA                      | Control (unplanted)            |
| South        | 27          | 1                       | <i>Shorea macrophylla</i>      |
| South        | 28          | 4                       | 4.7                            |
| South        | 29          | 16                      | 16                             |
| South        | 30          | 16                      | Climber cutting                |
| South        | 31          | 16                      | Climber cutting                |
| South        | 32          | 16                      | 16                             |
| South        | 33          | 16                      | Climber cutting                |

|       |    |    |                                |
|-------|----|----|--------------------------------|
| South | 34 | 1  | <i>Shorea argentifolia</i>     |
| South | 35 | 4  | 4.12                           |
| South | 36 | NA | Control (unplanted)            |
| South | 37 | 1  | <i>Shorea ovalis</i>           |
| South | 38 | 16 | 16                             |
| South | 39 | 4  | 4.9                            |
| South | 40 | 16 | Climber cutting                |
| South | 41 | 4  | 4.14                           |
| South | 42 | 16 | Climber cutting                |
| South | 43 | 1  | <i>Shorea faguetiana</i>       |
| South | 44 | 1  | <i>Parashorea malaanonan</i>   |
| South | 45 | 16 | 16                             |
| South | 46 | 16 | 16                             |
| South | 47 | NA | Control (unplanted)            |
| South | 48 | 4  | 4.16                           |
| South | 49 | 16 | 16                             |
| South | 50 | 1  | <i>Shorea macroptera</i>       |
| South | 51 | 16 | Climber cutting                |
| South | 52 | 1  | <i>Dipterocarpus conformis</i> |
| South | 53 | 16 | 16                             |
| South | 54 | 4  | 4.8                            |
| South | 55 | 16 | 16                             |
| South | 56 | 4  | 4.4                            |
| South | 57 | NA | Control (unplanted)            |
| South | 58 | 4  | 4.1                            |
| South | 59 | 1  | <i>Shorea johorensis</i>       |
| South | 60 | 4  | 4.15                           |
| South | 61 | 1  | <i>Hopea ferruginea</i>        |
| South | 62 | 16 | Climber cutting                |
| South | 63 | 16 | 16                             |
| South | 64 | 16 | 16                             |
| North | 65 | 1  | <i>Shorea parvifolia</i>       |
| North | 66 | 16 | 16                             |
| North | 67 | 4  | 4.2                            |
| North | 68 | NA | Control (unplanted)            |
| North | 69 | 1  | <i>Hopea ferruginea</i>        |

|       |     |    |                                |
|-------|-----|----|--------------------------------|
| North | 70  | 1  | <i>Parashorea malaanonan</i>   |
| North | 71  | 4  | 4.8                            |
| North | 72  | 16 | Climber cutting                |
| North | 73  | 16 | 16                             |
| North | 74  | 4  | 4.9                            |
| North | 75  | 16 | Climber cutting                |
| North | 76  | 16 | 16                             |
| North | 77  | 4  | 4.5                            |
| North | 78  | 1  | <i>Shorea faguetiana</i>       |
| North | 79  | 4  | 4.7                            |
| North | 80  | NA | Control (unplanted)            |
| North | 81  | 1  | <i>Shorea macrophylla</i>      |
| North | 82  | 4  | 4.4                            |
| North | 83  | 16 | 16                             |
| North | 84  | 1  | <i>Shorea beccariana</i>       |
| North | 85  | 16 | 16                             |
| North | 86  | 1  | <i>Dipterocarpus conformis</i> |
| North | 87  | 16 | 16                             |
| North | 88  | 4  | 4.6                            |
| North | 89  | NA | Control (unplanted)            |
| North | 90  | 1  | <i>Shorea argentifolia</i>     |
| North | 91  | 16 | 16                             |
| North | 92  | 16 | Climber cutting                |
| North | 93  | 4  | 4.10                           |
| North | 94  | 16 | 16                             |
| North | 95  | NA | Control (unplanted)            |
| North | 96  | 16 | 16                             |
| North | 97  | 4  | 4.14                           |
| North | 98  | 1  | <i>Parashorea tomentella</i>   |
| North | 99  | 16 | 16                             |
| North | 100 | 16 | Climber cutting                |
| North | 101 | 1  | <i>Shorea ovalis</i>           |
| North | 102 | 4  | 4.11                           |
| North | 103 | 16 | 16                             |
| North | 104 | 1  | <i>Dryobalanops lanceolata</i> |
| North | 105 | 4  | 4.13                           |

|       |     |    |                          |
|-------|-----|----|--------------------------|
| North | 106 | 16 | 16                       |
| North | 107 | 1  | <i>Shorea gibbosa</i>    |
| North | 108 | NA | Control (unplanted)      |
| North | 109 | 4  | 4.1                      |
| North | 110 | 1  | <i>Shorea macroptera</i> |
| North | 111 | 16 | Climber cutting          |
| North | 112 | 4  | 4.16                     |
| North | 113 | 16 | 16                       |
| North | 114 | 1  | <i>Shorea leprosula</i>  |
| North | 115 | 16 | 16                       |
| North | 116 | 4  | 4.12                     |
| North | 117 | NA | Control (unplanted)      |
| North | 118 | 1  | <i>Hopea sangal</i>      |
| North | 119 | 4  | 4.3                      |
| North | 120 | 16 | 16                       |
| North | 121 | 1  | <i>Shorea johorensis</i> |
| North | 122 | 4  | 4.15                     |
| North | 123 | 16 | Climber cutting          |
| North | 124 | 16 | 16                       |
